# Supplementary material
Source: PubMed Central journal article supplement (PMC4734581)
Supplement: supp_pp.15.01699_PP2015-01699R1_Supplemental_Material_1tbls.pdf [file supp_pp.15.01699_PP2015-01699R1_Supplemental_Material_1tbls.pdf]

**Supplementary Table I.** Compound class composition of the cuticular wax from adaxial leaf sides of *Citrus aurantium*, *Euonymus japonica*, *Clusia flava* and *Garcinia spicata*. Percentages within individual compound classes are given as mean values  $\pm$  standard deviation (n = 5).

|                       | <i>Citrus aurantium</i> |               |                         |            | <i>Euonymus japonica</i> |               |                         |            | <i>Clusia flava</i> |               |                         |            | <i>Garcinia spicata</i> |               |                         |             |
|-----------------------|-------------------------|---------------|-------------------------|------------|--------------------------|---------------|-------------------------|------------|---------------------|---------------|-------------------------|------------|-------------------------|---------------|-------------------------|-------------|
|                       | Epicut. wax             | Intracut. wax | Epi- plus intracut. wax | Total wax  | Epicut. wax              | Intracut. wax | Epi- plus intracut. wax | Total wax  | Epicut. wax         | Intracut. wax | Epi- plus intracut. wax | Total wax  | Epicut. wax             | Intracut. wax | Epi- plus intracut. wax | Total wax   |
| <b>Fatty acids</b>    | 6 $\pm$ 1               | 3 $\pm$ 1     | 5 $\pm$ 1               | 2 $\pm$ 0  | 9 $\pm$ 2                | 3 $\pm$ 1     | 4 $\pm$ 1               | 4 $\pm$ 2  | 1 $\pm$ 1           | 1 $\pm$ 0     | 1 $\pm$ 0               | 4 $\pm$ 1  | 3 $\pm$ 1               | 6 $\pm$ 2     | 4 $\pm$ 1               | 2 $\pm$ 2   |
| <b>prim. Alcohols</b> | 73 $\pm$ 3              | 23 $\pm$ 8    | 58 $\pm$ 7              | 65 $\pm$ 1 | 9 $\pm$ 1                |               | 2 $\pm$ 0               | 2 $\pm$ 0  | 13 $\pm$ 2          | 2 $\pm$ 0     | 6 $\pm$ 1               | 11 $\pm$ 1 | 13 $\pm$ 2              | 2 $\pm$ 1     | 11 $\pm$ 1              | 5 $\pm$ 1   |
| <b>Alkyl esters</b>   | 5 $\pm$ 1               | 2 $\pm$ 1     | 4 $\pm$ 1               | 4 $\pm$ 1  | 2 $\pm$ 0                |               |                         |            | 2 $\pm$ 0           |               | 1 $\pm$ 0               | 1 $\pm$ 0  |                         |               |                         |             |
| <b>Aldehydes</b>      | 3 $\pm$ 1               |               | 2 $\pm$ 1               | 2 $\pm$ 1  | 8 $\pm$ 3                |               | 1 $\pm$ 0               | 1 $\pm$ 1  | 2 $\pm$ 0           |               | 1 $\pm$ 0               | 6 $\pm$ 1  | 7 $\pm$ 1               | 1 $\pm$ 0     | 6 $\pm$ 1               | 3 $\pm$ 1   |
| <b>Alkanes</b>        | 9 $\pm$ 2               | 3 $\pm$ 1     | 7 $\pm$ 1               | 5 $\pm$ 1  | 65 $\pm$ 8               | 2 $\pm$ 0     | 12 $\pm$ 4              | 13 $\pm$ 4 | 79 $\pm$ 4          | 6 $\pm$ 1     | 35 $\pm$ 5              | 62 $\pm$ 8 | 75 $\pm$ 3              | 6 $\pm$ 2     | 62 $\pm$ 8              | 75 $\pm$ 16 |
| <b>Triterpenoids</b>  |                         | 45 $\pm$ 9    | 15 $\pm$ 7              | 13 $\pm$ 1 | 1 $\pm$ 0                | 87 $\pm$ 2    | 75 $\pm$ 2              | 74 $\pm$ 7 |                     | 86 $\pm$ 2    | 51 $\pm$ 6              | 4 $\pm$ 3  |                         | 23 $\pm$ 10   | 4 $\pm$ 3               | 7 $\pm$ 9   |
| <b>Sterols</b>        |                         | 2 $\pm$ 1     | 1 $\pm$ 0               | 2 $\pm$ 0  |                          |               |                         |            |                     |               |                         |            |                         | 2 $\pm$ 2     |                         |             |
| <b>Tocopherols</b>    |                         | 7 $\pm$ 4     | 2 $\pm$ 2               | 3 $\pm$ 1  |                          | 3 $\pm$ 0     | 3 $\pm$ 0               | 2 $\pm$ 1  |                     | 2 $\pm$ 0     | 1 $\pm$ 0               | 8 $\pm$ 4  |                         | 43 $\pm$ 6    | 8 $\pm$ 4               | 2 $\pm$ 1   |
| <b>Not identified</b> | 4 $\pm$ 1               | 13 $\pm$ 4    | 7 $\pm$ 2               | 6 $\pm$ 1  | 6 $\pm$ 3                | 3 $\pm$ 1     | 3 $\pm$ 1               | 3 $\pm$ 1  | 2 $\pm$ 0           | 2 $\pm$ 1     | 2 $\pm$ 0               | 4 $\pm$ 2  | 1 $\pm$ 0               | 16 $\pm$ 3    | 4 $\pm$ 2               | 6 $\pm$ 3   |

**Supplementary Table II.** Compound class composition of the cuticular waxes from adaxial leaf sides of *Tetrastigma voinierianum*, *Oreopanax guatemalensis*, *Monstera deliciosa* and *Schefflera elegantissima*. Percentages of individual compound classes within respective wax mixtures are given as mean values  $\pm$  standard deviation (n = 5).

|                       | <i>Tetrastigma voinierianum</i> |               |                         |            | <i>Oreopanax guatemalensis</i> |               |                         |            | <i>Monstera deliciosa</i> |               |                         |            | <i>Schefflera elegantissima</i> |               |                         |            |
|-----------------------|---------------------------------|---------------|-------------------------|------------|--------------------------------|---------------|-------------------------|------------|---------------------------|---------------|-------------------------|------------|---------------------------------|---------------|-------------------------|------------|
|                       | Epicut. wax                     | Intracut. wax | Epi- plus intracut. wax | Total wax  | Epicut. wax                    | Intracut. wax | Epi- plus intracut. wax | Total wax  | Epicut. wax               | Intracut. wax | Epi- plus intracut. wax | Total wax  | Epicut. wax                     | Intracut. wax | Epi- plus intracut. wax | Total wax  |
| <b>Fatty acids</b>    | 4 $\pm$ 2                       | 2 $\pm$ 1     | 4 $\pm$ 1               | 6 $\pm$ 2  | 44 $\pm$ 7                     | 22 $\pm$ 12   | 28 $\pm$ 8              | 28 $\pm$ 6 | 10 $\pm$ 3                | 5 $\pm$ 3     | 9 $\pm$ 4               | 10 $\pm$ 3 | 4 $\pm$ 2                       | 4 $\pm$ 1     | 5 $\pm$ 2               | 3 $\pm$ 2  |
| <b>prim. Alcohols</b> | 45 $\pm$ 4                      | 41 $\pm$ 4    | 44 $\pm$ 3              | 42 $\pm$ 8 | 17 $\pm$ 3                     | 26 $\pm$ 8    | 24 $\pm$ 5              | 22 $\pm$ 1 | 22 $\pm$ 2                | 12 $\pm$ 6    | 20 $\pm$ 3              | 17 $\pm$ 1 | 2 $\pm$ 1                       | 5 $\pm$ 1     | 3 $\pm$ 1               | 9 $\pm$ 2  |
| <b>Alkyl esters</b>   |                                 |               |                         |            |                                |               |                         |            | 13 $\pm$ 1                | 20 $\pm$ 7    | 14 $\pm$ 3              | 16 $\pm$ 4 |                                 |               |                         |            |
| <b>Aldehydes</b>      | 10 $\pm$ 5                      | 3 $\pm$ 1     | 9 $\pm$ 6               | 7 $\pm$ 2  | 21 $\pm$ 4                     | 26 $\pm$ 9    | 25 $\pm$ 9              | 29 $\pm$ 3 | 21 $\pm$ 2                | 12 $\pm$ 1    | 19 $\pm$ 1              | 16 $\pm$ 3 | 4 $\pm$ 3                       | 5 $\pm$ 3     | 5 $\pm$ 3               | 3 $\pm$ 1  |
| <b>Alkanes</b>        | 37 $\pm$ 4                      | 26 $\pm$ 4    | 32 $\pm$ 1              | 29 $\pm$ 8 | 15 $\pm$ 2                     | 20 $\pm$ 7    | 18 $\pm$ 5              | 16 $\pm$ 2 | 32 $\pm$ 4                | 17 $\pm$ 3    | 31 $\pm$ 3              | 35 $\pm$ 4 | 86 $\pm$ 7                      | 80 $\pm$ 5    | 84 $\pm$ 6              | 80 $\pm$ 3 |
| <b>Triterpenoids</b>  |                                 |               |                         |            |                                |               |                         |            |                           |               |                         |            |                                 |               |                         |            |
| <b>Sterols</b>        |                                 | 14 $\pm$ 1    | 5 $\pm$ 2               | 7 $\pm$ 1  |                                | 1 $\pm$ 1     | 1 $\pm$ 1               |            |                           | 19 $\pm$ 4    | 2 $\pm$ 0               | 4 $\pm$ 1  |                                 | 1 $\pm$ 0     |                         |            |
| <b>Tocopherols</b>    |                                 | 10 $\pm$ 3    | 4 $\pm$ 2               | 4 $\pm$ 2  |                                | 3 $\pm$ 2     | 2 $\pm$ 1               | 2 $\pm$ 0  |                           | 1 $\pm$ 1     |                         |            |                                 |               |                         |            |
| <b>Not identified</b> | 2 $\pm$ 0                       | 4 $\pm$ 12    | 2 $\pm$ 1               | 4 $\pm$ 2  | 3 $\pm$ 1                      | 3 $\pm$ 2     | 3 $\pm$ 2               | 2 $\pm$ 1  | 2 $\pm$ 1                 | 13 $\pm$ 3    | 4 $\pm$ 2               | 2 $\pm$ 1  | 2 $\pm$ 1                       | 4 $\pm$ 1     | 3 $\pm$ 1               | 5 $\pm$ 2  |

**Supplementary Table III.** Relative composition of the alicyclic compounds in the cuticular waxes from adaxial leaf sides of *Citrus aurantium*, *Euonymus japonica*, *Clusia flava* and *Garcinia spicata*. Amounts of individual compounds are given as percentages of the total coverage of alicyclic wax compounds (mean values  $\pm$  standard deviation; n = 5).

|                                       | <i>Citrus aurantium</i> |                 |                         |                | <i>Euonymus japonica</i> |                |                         |                | <i>Clusia flava</i> |                 |                         |                | <i>Garcinia spicata</i> |                |                         |                 |
|---------------------------------------|-------------------------|-----------------|-------------------------|----------------|--------------------------|----------------|-------------------------|----------------|---------------------|-----------------|-------------------------|----------------|-------------------------|----------------|-------------------------|-----------------|
|                                       | Epicut. wax             | Intracut. wax   | Epi- plus intracut. wax | Total wax      | Epicut. wax              | Intracut. wax  | Epi- plus intracut. wax | Total wax      | Epicut. wax         | Intracut. wax   | Epi- plus intracut. wax | Total wax      | Epicut. wax             | Intracut. wax  | Epi- plus intracut. wax | Total wax       |
| <b><math>\alpha</math>-Amyrin</b>     |                         | 5.5 $\pm$ 1.7   |                         | 4.9 $\pm$ 1.3  |                          | 1.8 $\pm$ 0.5  | 1.8 $\pm$ 0.5           | 1.9 $\pm$ 0.2  |                     | 3.0 $\pm$ 0.3   | 3.0 $\pm$ 0.3           | 3.2 $\pm$ 0.5  |                         | 9.5 $\pm$ 1.4  |                         | 43.4 $\pm$ 15.2 |
| <b><math>\beta</math>-Amyrin</b>      |                         | 4.5 $\pm$ 0.8   |                         | 4.5 $\pm$ 0.2  | 5.2 $\pm$ 7.6            | 2.9 $\pm$ 0.5  | 3.0 $\pm$ 0.4           | 3.1 $\pm$ 0.1  |                     | 3.8 $\pm$ 0.2   | 3.8 $\pm$ 0.2           | 3.9 $\pm$ 0.3  |                         | 2.6 $\pm$ 0.7  |                         | 13.1 $\pm$ 5.3  |
| <b>Friedelin</b>                      |                         | 9.8 $\pm$ 12.0  |                         | 15.3 $\pm$ 4.2 | 75.6 $\pm$ 12.0          | 32.9 $\pm$ 2.0 | 33.0 $\pm$ 2.0          | 32.7 $\pm$ 1.7 | 100 $\pm$ 0.0       | 38.0 $\pm$ 9.4  | 38.1 $\pm$ 9.4          | 37.1 $\pm$ 3.7 |                         | 19.0 $\pm$ 8.7 |                         | 13.3 $\pm$ 6.8  |
| <b>Lupenone</b>                       |                         | 10.8 $\pm$ 7.6  |                         | 0.5 $\pm$ 0.3  |                          | 57.6 $\pm$ 1.9 | 57.5 $\pm$ 1.9          | 56.2 $\pm$ 4.4 |                     | 47.4 $\pm$ 12.0 | 47.3 $\pm$ 11.9         | 45.0 $\pm$ 8.5 |                         |                |                         |                 |
| <b>Lupeol</b>                         |                         | 7.8 $\pm$ 17.1  |                         |                |                          | 0.6 $\pm$ 0.1  | 0.6 $\pm$ 0.1           | 0.6 $\pm$ 0.0  |                     | 0.3 $\pm$ 0.0   | 0.3 $\pm$ 0.0           | 0.5 $\pm$ 0.1  |                         | 2.4 $\pm$ 0.4  |                         |                 |
| <b>Lupeolester</b>                    |                         | 4.4 $\pm$ 0.5   |                         | 6.0 $\pm$ 1.2  |                          |                |                         |                |                     |                 |                         |                |                         |                |                         |                 |
| <b><math>\delta</math>-Tocopherol</b> |                         |                 |                         |                |                          | 0.1 $\pm$ 0.0  | 0.1 $\pm$ 0.0           | 0.1 $\pm$ 0.0  |                     | 0.2 $\pm$ 0.2   | 0.2 $\pm$ 0.2           | 0.2 $\pm$ 0.2  |                         |                |                         |                 |
| <b><math>\gamma</math>-Tocopherol</b> |                         | 3.9 $\pm$ 3.5   |                         | 4.0 $\pm$ 0.4  |                          | 2.6 $\pm$ 0.2  | 2.6 $\pm$ 0.2           | 2.5 $\pm$ 0.8  |                     | 0.8 $\pm$ 0.4   | 0.8 $\pm$ 0.4           | 0.7 $\pm$ 0.1  |                         | 8.8 $\pm$ 1.9  |                         | 4.5 $\pm$ 2.5   |
| <b><math>\alpha</math>-Tocopherol</b> |                         | 7.2 $\pm$ 5.8   |                         | 11.6 $\pm$ 4.2 |                          | 0.6 $\pm$ 0.2  | 0.6 $\pm$ 0.2           | 0.5 $\pm$ 0.1  |                     | 0.8 $\pm$ 0.2   | 0.8 $\pm$ 0.2           | 0.4 $\pm$ 0.0  |                         | 15.0 $\pm$ 6.3 |                         | 1.5 $\pm$ 0.7   |
| <b>Campesterol</b>                    |                         | 3.2 $\pm$ 0.9   |                         | 5.2 $\pm$ 1.0  |                          |                |                         |                |                     |                 |                         |                |                         |                |                         |                 |
| <b><math>\beta</math>-Sitosterol</b>  |                         | 1.3 $\pm$ 1.1   |                         | 3.7 $\pm$ 0.9  | 19.2 $\pm$ 12.1          | 0.1 $\pm$ 0.1  | 0.2 $\pm$ 0.1           | 0.1 $\pm$ 0.0  |                     | 0.4 $\pm$ 0.1   | 0.3 $\pm$ 0.1           | 0.3 $\pm$ 0.1  |                         | 0.2 $\pm$ 0.1  |                         | 2.2 $\pm$ 1.8   |
| <b>Stigmasterol</b>                   |                         |                 |                         |                |                          |                |                         |                |                     |                 |                         |                |                         | 2.1 $\pm$ 2.3  |                         | 0.0 $\pm$ 0.0   |
| <b>Unident. alicyclics</b>            |                         | 41.6 $\pm$ 28.9 |                         | 44.3 $\pm$ 6.1 |                          | 0.7 $\pm$ 0.7  | 0.7 $\pm$ 0.7           | 2.4 $\pm$ 4.3  |                     | 5.3 $\pm$ 4.1   | 5.3 $\pm$ 4.0           | 8.9 $\pm$ 7.6  |                         | 40.4 $\pm$ 4.1 |                         | 22.0 $\pm$ 10.4 |

**Supplementary Table IV.** Relative composition of the alicyclic compounds in the cuticular waxes from adaxial leaf sides of *Tetrastigma voinierianum*, *Oreopanax guatemalensis*, *Monstera deliciosa* and *Schefflera elegantissima*. Amounts of individual compounds are given as percentages of the total coverage of alicyclic wax compounds (mean values  $\pm$  standard deviation; n = 5).

|                         | <i>Tetrastigma voinierianum</i> |                |                         |                 | <i>Oreopanax guatemalensis</i> |                 |                         |                | <i>Monstera deliciosa</i> |                 |                         |                | <i>Schefflera elegantissima</i> |                 |                         |                 |
|-------------------------|---------------------------------|----------------|-------------------------|-----------------|--------------------------------|-----------------|-------------------------|----------------|---------------------------|-----------------|-------------------------|----------------|---------------------------------|-----------------|-------------------------|-----------------|
|                         | Epicut. wax                     | Intracut. wax  | Epi- plus intracut. wax | Total wax       | Epicut. wax                    | Intracut. wax   | Epi- plus intracut. wax | Total wax      | Epicut. wax               | Intracut. wax   | Epi- plus intracut. wax | Total wax      | Epicut. wax                     | Intracut. wax   | Epi- plus intracut. wax | Total wax       |
| $\alpha$ -Amyrin        |                                 |                |                         |                 |                                |                 |                         |                |                           |                 |                         |                |                                 |                 |                         |                 |
| $\beta$ -Amyrin         |                                 |                |                         |                 |                                |                 |                         |                |                           |                 |                         |                |                                 |                 |                         |                 |
| Friedelin               |                                 |                |                         |                 |                                |                 |                         |                |                           |                 |                         |                |                                 |                 |                         |                 |
| Lupenone                |                                 |                |                         |                 |                                |                 |                         |                |                           |                 |                         |                |                                 |                 |                         |                 |
| Lupeol                  |                                 |                |                         |                 |                                |                 |                         |                |                           |                 |                         |                |                                 |                 |                         |                 |
| Lupeolester             |                                 |                |                         |                 |                                |                 |                         |                |                           |                 |                         |                |                                 |                 |                         |                 |
| $\delta$ -Tocopherol    |                                 |                |                         |                 |                                |                 |                         |                |                           |                 |                         |                |                                 |                 |                         |                 |
| $\gamma$ -Tocopherol    |                                 | 2.9 $\pm$ 0.8  |                         | 2.1 $\pm$ 1.3   |                                | 47.9 $\pm$ 15.3 |                         | 51.2 $\pm$ 6.1 |                           | 4.1 $\pm$ 2.7   |                         | 3.2 $\pm$ 0.8  |                                 |                 | 5.3 $\pm$ 5.8           |                 |
| $\alpha$ -Tocopherol    |                                 | 5.6 $\pm$ 1.1  |                         | 4.5 $\pm$ 2.7   |                                | 15.8 $\pm$ 10.0 |                         | 6.8 $\pm$ 4.4  |                           | 1.4 $\pm$ 2.7   |                         |                |                                 |                 |                         |                 |
| Campesterol             |                                 | 21.4 $\pm$ 5.3 |                         | 32.3 $\pm$ 11.2 |                                |                 |                         |                |                           | 6.5 $\pm$ 1.2   |                         | 9.2 $\pm$ 1.1  |                                 |                 |                         |                 |
| $\beta$ -Sitosterol     |                                 | 42.1 $\pm$ 4.7 |                         | 35.0 $\pm$ 9.7  |                                | 24.5 $\pm$ 20.0 |                         | 2.9 $\pm$ 1.5  |                           | 21.8 $\pm$ 19.3 |                         | 11.5 $\pm$ 1.9 |                                 | 40.7 $\pm$ 23.8 |                         | 51.9 $\pm$ 26.8 |
| Stigamsterol            |                                 | 27.6 $\pm$ 8.1 |                         | 25.1 $\pm$ 5.3  |                                |                 |                         |                |                           | 66.2 $\pm$ 15.5 |                         | 76.1 $\pm$ 3.2 |                                 | 54.0 $\pm$ 23.1 |                         | 48.1 $\pm$ 26.8 |
| Unidentified alicyclics |                                 | 0.4 $\pm$ 0.1  |                         | 0.9 $\pm$ 0.9   |                                | 11.7 $\pm$ 16.0 |                         | 39.1 $\pm$ 9.3 |                           |                 |                         |                |                                 |                 |                         |                 |

28 **Supplementary Table V.** Chain length composition of VLCFA derivative classes in the cuticular wax from adaxial leaf sides of *Citrus aurantium*,  
 29 *Euonymus japonica*, *Clusia flava* and *Garcinia spicata*. Percentages within individual compound classes are given as mean values  $\pm$  standard deviation  
 30 (n = 5). Trace (“tr”) signifies values that were below 0.05  $\mu\text{g}/\text{cm}^2$ . Data for other minor chain lengths are not shown.  
 31

|                       | <i>Citrus aurantium</i> |               |                         |             | <i>Euonymus japonica</i> |               |                         |             | <i>Clusia flava</i> |               |                         |             | <i>Garcinia spicata</i> |               |                         |             |
|-----------------------|-------------------------|---------------|-------------------------|-------------|--------------------------|---------------|-------------------------|-------------|---------------------|---------------|-------------------------|-------------|-------------------------|---------------|-------------------------|-------------|
|                       | Epicut. wax             | Intracut. wax | Epi- plus intracut. wax | Total wax   | Epicut. wax              | Intracut. wax | Epi- plus intracut. wax | Total wax   | Epicut. wax         | Intracut. wax | Epi- plus intracut. wax | Total wax   | Epicut. wax             | Intracut. wax | Epi- plus intracut. wax | Total wax   |
| <b>Fatty acids</b>    | <b>20</b>               | 6 $\pm$ 5     | 9 $\pm$ 6               | 6 $\pm$ 5   | 3 $\pm$ 1                | 2 $\pm$ 1     | 1 $\pm$ 3               | 1 $\pm$ 1   | 3 $\pm$ 1           | 2 $\pm$ 2     | 2 $\pm$ 2               | 2 $\pm$ 1   | 2 $\pm$ 1               | 14 $\pm$ 8    | 20 $\pm$ 9              | 14 $\pm$ 7  |
|                       | <b>22</b>               | 5 $\pm$ 3     | 4 $\pm$ 4               | 5 $\pm$ 3   | 11 $\pm$ 4               | 2 $\pm$ 0.4   | 27 $\pm$ 22             | 16 $\pm$ 16 | 4 $\pm$ 3           | tr            | tr                      | tr          | tr                      | 20 $\pm$ 10   | 9 $\pm$ 16              | 20 $\pm$ 10 |
|                       | <b>24</b>               | 17 $\pm$ 5    | 3 $\pm$ 7               | 15 $\pm$ 4  | 30 $\pm$ 4               | 14 $\pm$ 3    | 11 $\pm$ 4              | 12 $\pm$ 3  | 14 $\pm$ 1          | tr            | 5 $\pm$ 2               | 2 $\pm$ 1   | 5 $\pm$ 1               | 8 $\pm$ 5     | tr                      | 7 $\pm$ 4   |
|                       | <b>26</b>               | 27 $\pm$ 3    | 25 $\pm$ 8              | 27 $\pm$ 3  | 46 $\pm$ 15              | 33 $\pm$ 5    | 8 $\pm$ 3               | 21 $\pm$ 8  | 28 $\pm$ 3          | 5 $\pm$ 1     | 27 $\pm$ 8              | 14 $\pm$ 3  | 26 $\pm$ 12             | 10 $\pm$ 2    | 19 $\pm$ 15             | 11 $\pm$ 2  |
|                       | <b>28</b>               | 23 $\pm$ 4    |                         | 21 $\pm$ 4  |                          | 6 $\pm$ 1     | 21 $\pm$ 7              | 13 $\pm$ 3  | 10 $\pm$ 4          | 20 $\pm$ 3    | 4 $\pm$ 8               | 14 $\pm$ 4  | tr                      | 16 $\pm$ 10   | 6 $\pm$ 6               | 16 $\pm$ 9  |
|                       | <b>30</b>               | 4 $\pm$ 3     |                         | 4 $\pm$ 3   |                          | 5 $\pm$ 2     | 5 $\pm$ 3               | 4 $\pm$ 2   | 10 $\pm$ 3          | 10 $\pm$ 2    | 18 $\pm$ 7              | 13 $\pm$ 3  | 21 $\pm$ 4              | 11 $\pm$ 9    |                         | 10 $\pm$ 8  |
|                       | <b>32</b>               | 4 $\pm$ 4     | 28 $\pm$ 24             | 5 $\pm$ 4   | tr                       | 20 $\pm$ 7    | 5 $\pm$ 1               | 13 $\pm$ 5  | 12 $\pm$ 2          | 26 $\pm$ 8    |                         | 15 $\pm$ 4  | 13 $\pm$ 4              | 2 $\pm$ 2     |                         | 2 $\pm$ 2   |
|                       | <b>34</b>               |               |                         |             |                          | 28 $\pm$ 13   | 5 $\pm$ 3               | 15 $\pm$ 7  | 15 $\pm$ 5          | tr            |                         | tr          | 16 $\pm$ 7              |               |                         | 3 $\pm$ 6   |
|                       | <b>36</b>               |               |                         |             |                          |               |                         |             |                     | 7 $\pm$ 5     | 3 $\pm$ 3               | 5 $\pm$ 2   | 4 $\pm$ 1               |               |                         |             |
| <b>prim. Alcohols</b> | <b>22</b>               | tr            | tr                      | tr          | tr                       | 1 $\pm$ 0.2   |                         | tr          | 3 $\pm$ 4           |               |                         |             |                         |               |                         |             |
|                       | <b>24</b>               | 11 $\pm$ 2    | 2 $\pm$ 1               | 10 $\pm$ 2  | 10 $\pm$ 1               | 8 $\pm$ 2     | 3 $\pm$ 3               | 7 $\pm$ 2   | 9 $\pm$ 1           |               |                         |             |                         | 2 $\pm$ 0.2   |                         | 3 $\pm$ 0.2 |
|                       | <b>26</b>               | 39 $\pm$ 5    | 11 $\pm$ 5              | 36 $\pm$ 5  | 40 $\pm$ 3               | 33 $\pm$ 3    | 9 $\pm$ 5               | 27 $\pm$ 4  | 33 $\pm$ 2          | tr            | tr                      | tr          | 1 $\pm$ 0.1             | 32 $\pm$ 2    | 12 $\pm$ 4              | 31 $\pm$ 2  |
|                       | <b>28</b>               | 14 $\pm$ 1    | 10 $\pm$ 2              | 13 $\pm$ 1  | 14 $\pm$ 0.4             | 12 $\pm$ 2    | 14 $\pm$ 6              | 13 $\pm$ 3  | 13 $\pm$ 2          | 23 $\pm$ 6    | 9 $\pm$ 0.3             | 20 $\pm$ 5  | 32 $\pm$ 9              | 24 $\pm$ 2    | 22 $\pm$ 10             | 24 $\pm$ 1  |
|                       | <b>30</b>               | 9 $\pm$ 2     | 11 $\pm$ 6              | 9 $\pm$ 3   | 9 $\pm$ 1                | 3 $\pm$ 2     | 10 $\pm$ 10             | 5 $\pm$ 4   | 1 $\pm$ 1           | 6 $\pm$ 1     | 6 $\pm$ 3               | 6 $\pm$ 1   | 1 $\pm$ 0.4             | 11 $\pm$ 1    | 4 $\pm$ 2               | 11 $\pm$ 1  |
|                       | <b>32</b>               | 10 $\pm$ 3    | 34 $\pm$ 2              | 12 $\pm$ 4  | 11 $\pm$ 1               | 13 $\pm$ 1    | 17 $\pm$ 4              | 14 $\pm$ 1  | 10 $\pm$ 2          | 14 $\pm$ 1    | 29 $\pm$ 2              | 17 $\pm$ 1  | 19 $\pm$ 2              | 13 $\pm$ 2    | 11 $\pm$ 1              | 13 $\pm$ 1  |
|                       | <b>34</b>               | 3 $\pm$ 1     | 12 $\pm$ 5              | 4 $\pm$ 1   | 3 $\pm$ 0.1              | 15 $\pm$ 2    | 26 $\pm$ 18             | 18 $\pm$ 5  | 19 $\pm$ 3          | 27 $\pm$ 2    | 26 $\pm$ 2              | 27 $\pm$ 1  | 26 $\pm$ 2              | 5 $\pm$ 2     | 17 $\pm$ 3              | 6 $\pm$ 2   |
|                       | <b>36</b>               | 1 $\pm$ 0.1   | 2 $\pm$ 1               | 1 $\pm$ 0.1 | 1 $\pm$ 0.1              |               |                         |             |                     | 11 $\pm$ 2    | 10 $\pm$ 0.4            | 11 $\pm$ 1  | 9 $\pm$ 2               |               |                         |             |
|                       | <b>38</b>               | tr            | tr                      | tr          | tr                       |               |                         |             |                     | 5 $\pm$ 1     | 5 $\pm$ 0.3             | 5 $\pm$ 1   | 4 $\pm$ 1               |               |                         |             |
| <b>Alkyl esters</b>   | <b>38</b>               | 3 $\pm$ 1     | 14 $\pm$ 3              | 5 $\pm$ 1   | 4 $\pm$ 1                |               |                         |             |                     |               |                         |             |                         |               |                         |             |
|                       | <b>40</b>               | 8 $\pm$ 1     | 13 $\pm$ 5              | 8 $\pm$ 2   | 9 $\pm$ 2                |               |                         |             |                     |               |                         |             |                         |               |                         |             |
|                       | <b>42</b>               | 27 $\pm$ 6    | 5 $\pm$ 3               | 23 $\pm$ 7  | 28 $\pm$ 3               | 3 $\pm$ 1     |                         | 3 $\pm$ 1   |                     |               |                         |             |                         |               |                         |             |
|                       | <b>44</b>               | 20 $\pm$ 14   | 1 $\pm$ 2               | 16 $\pm$ 10 | 14 $\pm$ 1               | 4 $\pm$ 2     |                         | 4 $\pm$ 2   |                     | 6 $\pm$ 1     | 4 $\pm$ 2               | 6 $\pm$ 1   | 4 $\pm$ 1               |               |                         |             |
|                       | <b>46</b>               | 10 $\pm$ 2    | 6 $\pm$ 4               | 10 $\pm$ 2  | 11 $\pm$ 1               | 3 $\pm$ 1     |                         | 3 $\pm$ 1   |                     | 7 $\pm$ 1     | 1 $\pm$ 2               | 5 $\pm$ 1   | 5 $\pm$ 1               |               |                         |             |
|                       | <b>48</b>               | 9 $\pm$ 2     | 13 $\pm$ 10             | 10 $\pm$ 4  | 9 $\pm$ 2                | 6 $\pm$ 2     |                         | 6 $\pm$ 2   |                     | 20 $\pm$ 2    | 21 $\pm$ 3              | 20 $\pm$ 3  | 15 $\pm$ 2              |               |                         |             |
|                       | <b>50</b>               | 3 $\pm$ 2     | 9 $\pm$ 6               | 4 $\pm$ 2   | 2 $\pm$ 2                | 14 $\pm$ 1    |                         | 14 $\pm$ 1  |                     | 43 $\pm$ 1    | 47 $\pm$ 7              | 44 $\pm$ 2  | 34 $\pm$ 4              |               |                         |             |
|                       | <b>52</b>               | 2 $\pm$ 1     | 1 $\pm$ 2               | 2 $\pm$ 1   | 1 $\pm$ 2                | 32 $\pm$ 3    |                         | 32 $\pm$ 3  |                     | 25 $\pm$ 4    | 17 $\pm$ 2              | 23 $\pm$ 3  | 20 $\pm$ 1              |               |                         |             |
|                       | <b>54</b>               |               |                         |             |                          | 38 $\pm$ 3    |                         | 38 $\pm$ 3  |                     |               | 9 $\pm$ 2               | 2 $\pm$ 1   | 13 $\pm$ 7              |               |                         |             |
| <b>Aldehydes</b>      | <b>24</b>               | 11 $\pm$ 3    | 8 $\pm$ 18              | 11 $\pm$ 3  | 12 $\pm$ 3               | 1 $\pm$ 0.4   |                         | 1 $\pm$ 0.4 |                     | 3 $\pm$ 1     |                         | 2 $\pm$ 1   | 3 $\pm$ 1               | tr            | 6 $\pm$ 6               | tr          |
|                       | <b>26</b>               | 24 $\pm$ 5    | tr                      | 23 $\pm$ 5  | 39 $\pm$ 5               | 4 $\pm$ 1     |                         | 3 $\pm$ 1   |                     | tr            | 1 $\pm$ 3               | 1 $\pm$ 1   | 2 $\pm$ 2               | 2 $\pm$ 1     | tr                      | 2 $\pm$ 1   |
|                       | <b>28</b>               | 9 $\pm$ 3     | 5 $\pm$ 8               | 9 $\pm$ 3   | 13 $\pm$ 3               | 4 $\pm$ 2     | 3 $\pm$ 4               | 3 $\pm$ 2   | 7 $\pm$ 6           | 7 $\pm$ 4     | 4 $\pm$ 1               | 6 $\pm$ 3   | 22 $\pm$ 5              | 5 $\pm$ 1     | 9 $\pm$ 11              | 5 $\pm$ 1   |
|                       | <b>30</b>               | 11 $\pm$ 3    | tr                      | 11 $\pm$ 2  | tr                       | 3 $\pm$ 2     |                         | 2 $\pm$ 2   | tr                  | 5 $\pm$ 2     | 7 $\pm$ 5               | 5 $\pm$ 2   | tr                      | 19 $\pm$ 2    | 14 $\pm$ 10             | 19 $\pm$ 2  |
|                       | <b>32</b>               | 6 $\pm$ 3     | 20 $\pm$ 29             | 7 $\pm$ 4   | 11 $\pm$ 3               | 30 $\pm$ 2    |                         | 23 $\pm$ 4  | 11 $\pm$ 7          | 25 $\pm$ 1    | 26 $\pm$ 5              | 26 $\pm$ 2  | 17 $\pm$ 1              | 37 $\pm$ 2    | 28 $\pm$ 13             | 36 $\pm$ 2  |
|                       | <b>34</b>               | 1 $\pm$ 1     | 12 $\pm$ 27             | 1 $\pm$ 1   | 2 $\pm$ 3                | 51 $\pm$ 5    | 74 $\pm$ 18             | 56 $\pm$ 5  | 66 $\pm$ 13         | 51 $\pm$ 5    | 74 $\pm$ 18             | 56 $\pm$ 5  | 66 $\pm$ 13             | 12 $\pm$ 4    | 36 $\pm$ 9              | 13 $\pm$ 3  |
| <b>Alkanes</b>        | <b>27</b>               | 7 $\pm$ 2     | 6 $\pm$ 2               | 7 $\pm$ 2   | 9 $\pm$ 1                | 1 $\pm$ 0.3   | 4 $\pm$ 2               | 2 $\pm$ 0.5 | 1 $\pm$ 0.2         | 1 $\pm$ 0.3   | 4 $\pm$ 2               | 2 $\pm$ 0.5 | 1 $\pm$ 0.2             | 1 $\pm$ 0.3   | tr                      | 1 $\pm$ 0.3 |
|                       | <b>29</b>               | 8 $\pm$ 2     | 7 $\pm$ 4               | 8 $\pm$ 2   | 9 $\pm$ 1                | 11 $\pm$ 2    | 15 $\pm$ 3              | 12 $\pm$ 2  | 8 $\pm$ 1           | 11 $\pm$ 2    | 15 $\pm$ 3              | 12 $\pm$ 2  | 8 $\pm$ 1               | 20 $\pm$ 4    | 18 $\pm$ 3              | 20 $\pm$ 4  |
|                       | <b>31</b>               | 42 $\pm$ 4    | 30 $\pm$ 7              | 41 $\pm$ 4  | 44 $\pm$ 3               | 42 $\pm$ 3    | 30 $\pm$ 9              | 40 $\pm$ 5  | 41 $\pm$ 1          | 42 $\pm$ 3    | 30 $\pm$ 9              | 40 $\pm$ 5  | 41 $\pm$ 1              | 59 $\pm$ 3    | 44 $\pm$ 6              | 58 $\pm$ 3  |

|           |        |         |        |        |         |        |         |         |         |        |         |         |       |       |       |        |
|-----------|--------|---------|--------|--------|---------|--------|---------|---------|---------|--------|---------|---------|-------|-------|-------|--------|
| <b>33</b> | 18 ± 6 | 18 ± 14 | 17 ± 7 | 21 ± 2 | 28 ± 4  | 12 ± 4 | 25 ± 4  | 33 ± 3  | 28 ± 4  | 12 ± 4 | 25 ± 4  | 33 ± 3  | 7 ± 2 | 4 ± 3 | 7 ± 2 | 10 ± 1 |
| <b>35</b> | 2 ± 1  | 1 ± 2   | 2 ± 1  | 3 ± 1  | 1 ± 0.2 | 1 ± 1  | 1 ± 0.1 | 1 ± 0.2 | 1 ± 0.2 | 1 ± 1  | 1 ± 0.1 | 1 ± 0.2 |       | 2 ± 2 | tr    |        |

---

33 **Supplementary Table VI.** Chain length composition of VLCFA derivative classes in the cuticular wax from adaxial leaf sides of *Tetrastigma*  
 34 *voinierianum*, *Oreopanax guatemalensis*, *Monstera deliciosa* and *Schefflera elegantissima*. Percentages within individual compound classes are given as  
 35 mean values  $\pm$  standard deviation (n = 5). Trace (“tr”) signifies values that were below 0.05  $\mu\text{g}/\text{cm}^2$ . Data for other minor chain lengths are not shown.  
 36

|                       | <i>Tetrastigma voinierianum</i> |               |                         |               | <i>Oreopanax guatemalensis</i> |               |                         |               | <i>Monstera deliciosa</i> |               |                         |               | <i>Schefflera elegantissima</i> |               |                         |               |               |
|-----------------------|---------------------------------|---------------|-------------------------|---------------|--------------------------------|---------------|-------------------------|---------------|---------------------------|---------------|-------------------------|---------------|---------------------------------|---------------|-------------------------|---------------|---------------|
|                       | Epicut. wax                     | Intracut. wax | Epi- plus intracut. wax | Total wax     | Epicut. wax                    | Intracut. wax | Epi- plus intracut. wax | Total wax     | Epicut. wax               | Intracut. wax | Epi- plus intracut. wax | Total wax     | Epicut. wax                     | Intracut. wax | Epi- plus intracut. wax | Total wax     |               |
| <b>Fatty acids</b>    | <b>20</b>                       | 1 $\pm$ 1     | 1 $\pm$ 1               | 1 $\pm$ 1     | 0.3 $\pm$ 0.2                  | 1 $\pm$ 0.2   | 1 $\pm$ 1               | 1 $\pm$ 0.4   | 1 $\pm$ 0.1               | 1 $\pm$ 0.1   | 1 $\pm$ 1               | 1 $\pm$ 0.1   | 0.1 $\pm$ 0.1                   | 0.4 $\pm$ 0.4 | 3 $\pm$ 2               | 1 $\pm$ 0.4   | 2 $\pm$ 4     |
|                       | <b>22</b>                       | 0.3 $\pm$ 1   | tr                      | 0.2 $\pm$ 0.3 | 0.1 $\pm$ 0.2                  | 22 $\pm$ 6    | 36 $\pm$ 10             | 29 $\pm$ 11   | 28 $\pm$ 1                | 1 $\pm$ 0.1   | 2 $\pm$ 1               | 1 $\pm$ 0.1   | 1 $\pm$ 0.2                     | 1 $\pm$ 1     | 1 $\pm$ 2               | 1 $\pm$ 1     | 3 $\pm$ 5     |
|                       | <b>24</b>                       | 2 $\pm$ 1     | tr                      | 2 $\pm$ 1     | 2 $\pm$ 0.4                    | 34 $\pm$ 6    | 36 $\pm$ 9              | 35 $\pm$ 8    | 33 $\pm$ 1                | 3 $\pm$ 0.4   | 1 $\pm$ 1               | 2 $\pm$ 0.3   | 3 $\pm$ 1                       | 1 $\pm$ 0.4   | 3 $\pm$ 3               | 1 $\pm$ 1     | 0.3 $\pm$ 1   |
|                       | <b>26</b>                       | 20 $\pm$ 5    | 2 $\pm$ 1               | 16 $\pm$ 6    | 7 $\pm$ 2                      | 9 $\pm$ 1     | 1 $\pm$ 2               | 5 $\pm$ 3     | 7 $\pm$ 1                 | 3 $\pm$ 1     | 1 $\pm$ 1               | 3 $\pm$ 1     | 3 $\pm$ 0.4                     | 1 $\pm$ 1     | 1 $\pm$ 1               | 1 $\pm$ 1     | 3 $\pm$ 5     |
|                       | <b>28</b>                       | 48 $\pm$ 8    | 9 $\pm$ 6               | 37 $\pm$ 9    | 7 $\pm$ 4                      | 11 $\pm$ 3    | 4 $\pm$ 5               | 9 $\pm$ 5     | 9 $\pm$ 0.4               | 13 $\pm$ 2    | 9 $\pm$ 2               | 13 $\pm$ 2    | 12 $\pm$ 3                      | 4 $\pm$ 2     | 15 $\pm$ 5              | 5 $\pm$ 1     | 12 $\pm$ 14   |
|                       | <b>30</b>                       | 25 $\pm$ 11   | 46 $\pm$ 7              | 30 $\pm$ 10   | 60 $\pm$ 6                     | 20 $\pm$ 8    | 17 $\pm$ 13             | 19 $\pm$ 11   | 21 $\pm$ 1                | 48 $\pm$ 2    | 35 $\pm$ 30             | 47 $\pm$ 3    | 52 $\pm$ 11                     | 19 $\pm$ 11   | 28 $\pm$ 8              | 21 $\pm$ 8    | 11 $\pm$ 8    |
|                       | <b>32</b>                       | 3 $\pm$ 4     | 30 $\pm$ 8              | 11 $\pm$ 4    | 22 $\pm$ 9                     | 0.3 $\pm$ 0.3 |                         | 0.2 $\pm$ 0.3 |                           | 25 $\pm$ 7    | 19 $\pm$ 14             | 25 $\pm$ 6    | 25 $\pm$ 9                      | 64 $\pm$ 10   | 21 $\pm$ 9              | 58 $\pm$ 7    | 2 $\pm$ 2     |
|                       | <b>34</b>                       | 1 $\pm$ 1     | 7 $\pm$ 3               | 2 $\pm$ 1     | 11 $\pm$ 9                     |               |                         |               |                           | 4 $\pm$ 2     | 9 $\pm$ 8               | 4 $\pm$ 2     | 2 $\pm$ 2                       |               |                         |               |               |
|                       | <b>36</b>                       | 0.1 $\pm$ 0.2 | 1 $\pm$ 1               | 0.1 $\pm$ 0.3 | 5 $\pm$ 4                      |               |                         |               |                           |               |                         |               |                                 |               |                         |               |               |
| <b>prim. Alcohols</b> | <b>22</b>                       | tr            |                         | tr            | 0.2 $\pm$ 0.0                  | 2 $\pm$ 1     | 0.1 $\pm$ 0.1           | 0.4 $\pm$ 0.1 | 0.4 $\pm$ 0.0             |               |                         |               |                                 | tr            |                         | tr            |               |
|                       | <b>24</b>                       | 1 $\pm$ 0.1   | tr                      | 0.4 $\pm$ 0.0 | 0.1 $\pm$ 0.1                  | 6 $\pm$ 2     | 1 $\pm$ 1               | 2 $\pm$ 0.4   | 3 $\pm$ 0.1               | 3 $\pm$ 1     | 1 $\pm$ 0.1             | 3 $\pm$ 0.5   | 6 $\pm$ 0.4                     | 1 $\pm$ 1     |                         | 0.3 $\pm$ 0.4 |               |
|                       | <b>26</b>                       | 16 $\pm$ 1    | 1 $\pm$ 0.1             | 11 $\pm$ 1    | 5 $\pm$ 1                      | 6 $\pm$ 1     | 3 $\pm$ 1               | 4 $\pm$ 1     | 3 $\pm$ 0.2               | 8 $\pm$ 3     | 4 $\pm$ 2               | 8 $\pm$ 3     | 15 $\pm$ 1                      | 1 $\pm$ 1     | 1 $\pm$ 0.3             | 1 $\pm$ 1     | 1 $\pm$ 1     |
|                       | <b>28</b>                       | 44 $\pm$ 1    | 14 $\pm$ 1              | 33 $\pm$ 4    | 21 $\pm$ 3                     | 23 $\pm$ 1    | 18 $\pm$ 3              | 20 $\pm$ 2    | 18 $\pm$ 1                | 14 $\pm$ 2    | 10 $\pm$ 3              | 14 $\pm$ 1    | 14 $\pm$ 1                      | 2 $\pm$ 1     | 1 $\pm$ 1               | 2 $\pm$ 1     | 11 $\pm$ 8    |
|                       | <b>30</b>                       | 26 $\pm$ 1    | 45 $\pm$ 1              | 33 $\pm$ 1    | 36 $\pm$ 1                     | 45 $\pm$ 6    | 65 $\pm$ 7              | 60 $\pm$ 6    | 67 $\pm$ 2                | 41 $\pm$ 2    | 34 $\pm$ 14             | 40 $\pm$ 2    | 31 $\pm$ 1                      | 8 $\pm$ 6     | 6 $\pm$ 5               | 7 $\pm$ 6     | 28 $\pm$ 17   |
|                       | <b>32</b>                       | 8 $\pm$ 1     | 25 $\pm$ 1              | 14 $\pm$ 2    | 18 $\pm$ 4                     | 1 $\pm$ 0.5   | 2 $\pm$ 1               | 2 $\pm$ 1     | 0.1 $\pm$ 0.1             | 27 $\pm$ 3    | 41 $\pm$ 22             | 28 $\pm$ 3    | 28 $\pm$ 1                      | 48 $\pm$ 7    | 60 $\pm$ 7              | 54 $\pm$ 4    | 47 $\pm$ 13   |
|                       | <b>34</b>                       | 2 $\pm$ 0.1   | 8 $\pm$ 0.2             | 4 $\pm$ 1     | 11 $\pm$ 1                     | 1 $\pm$ 0.4   | 0.4 $\pm$ 0.3           | 0.5 $\pm$ 0.3 | 0.4 $\pm$ 0.1             | 4 $\pm$ 1     | 7 $\pm$ 3               | 4 $\pm$ 0.5   | 4 $\pm$ 0.3                     | 10 $\pm$ 4    | 19 $\pm$ 5              | 14 $\pm$ 4    | 5 $\pm$ 6     |
|                       | <b>36</b>                       | 0.5 $\pm$ 0.0 | 2 $\pm$ 0.1             | 1 $\pm$ 0.2   | 4 $\pm$ 1                      |               |                         |               |                           |               |                         |               |                                 |               |                         |               |               |
|                       | <b>38</b>                       | 0.1 $\pm$ 0.0 | 2 $\pm$ 0.2             | 1 $\pm$ 0.2   | 2 $\pm$ 1                      |               |                         |               |                           |               |                         |               |                                 |               |                         |               |               |
| <b>Alkyl esters</b>   | <b>42</b>                       |               |                         |               |                                |               |                         |               |                           | 1 $\pm$ 0.1   | 3 $\pm$ 1               | 1 $\pm$ 0.1   | 1 $\pm$ 0.2                     |               |                         |               |               |
|                       | <b>44</b>                       |               |                         |               |                                |               |                         |               |                           | 3 $\pm$ 1     | 5 $\pm$ 1               | 3 $\pm$ 1     | 4 $\pm$ 1                       |               |                         |               |               |
|                       | <b>46</b>                       |               |                         |               |                                |               |                         |               |                           | 10 $\pm$ 1    | 10 $\pm$ 2              | 10 $\pm$ 1    | 14 $\pm$ 3                      |               |                         |               |               |
|                       | <b>48</b>                       |               |                         |               |                                |               |                         |               |                           | 17 $\pm$ 2    | 17 $\pm$ 2              | 17 $\pm$ 2    | 21 $\pm$ 3                      |               |                         |               |               |
|                       | <b>50</b>                       |               |                         |               |                                |               |                         |               |                           | 27 $\pm$ 1    | 22 $\pm$ 2              | 26 $\pm$ 0.3  | 26 $\pm$ 1                      |               |                         |               |               |
|                       | <b>52</b>                       |               |                         |               |                                |               |                         |               |                           | 40 $\pm$ 4    | 38 $\pm$ 6              | 40 $\pm$ 4    | 31 $\pm$ 5                      |               |                         |               |               |
| <b>Aldehydes</b>      | <b>24</b>                       | 0.5 $\pm$ 0.3 | 1 $\pm$ 0.4             | 1 $\pm$ 0.3   | 0.5 $\pm$ 0.4                  | 1 $\pm$ 1     | 1 $\pm$ 2               | 1 $\pm$ 1     | 0.3 $\pm$ 0.0             | 0.4 $\pm$ 0.2 |                         | 0.3 $\pm$ 0.2 | 1 $\pm$ 0.2                     | 1 $\pm$ 1     | 2 $\pm$ 2               | 1 $\pm$ 1     |               |
|                       | <b>26</b>                       | 8 $\pm$ 1     | tr                      | 7 $\pm$ 1     | 3 $\pm$ 2                      | 1 $\pm$ 0.2   | 1 $\pm$ 0.4             | 1 $\pm$ 0.3   | 0.3 $\pm$ 0.1             | 3 $\pm$ 3     | 0.1 $\pm$ 0.2           | 3 $\pm$ 3     | 3 $\pm$ 1                       | 0.3 $\pm$ 0.5 | 2 $\pm$ 2               | 1 $\pm$ 1     | 0.1 $\pm$ 0.3 |
|                       | <b>28</b>                       | 27 $\pm$ 2    | 10 $\pm$ 3              | 24 $\pm$ 2    | 12 $\pm$ 3                     | 14 $\pm$ 3    | 12 $\pm$ 4              | 12 $\pm$ 3    | 11 $\pm$ 1                | 7 $\pm$ 1     | 3 $\pm$ 1               | 7 $\pm$ 1     | 9 $\pm$ 3                       | 3 $\pm$ 1     | 1 $\pm$ 2               | 2 $\pm$ 1     | 16 $\pm$ 13   |
|                       | <b>30</b>                       | 47 $\pm$ 1    | 31 $\pm$ 6              | 44 $\pm$ 2    | 21 $\pm$ 4                     | 77 $\pm$ 7    | 80 $\pm$ 5              | 79 $\pm$ 5    | 79 $\pm$ 1                | 32 $\pm$ 2    | 17 $\pm$ 8              | 30 $\pm$ 2    | 35 $\pm$ 5                      | 16 $\pm$ 7    | 27 $\pm$ 10             | 21 $\pm$ 4    | 12 $\pm$ 4    |
|                       | <b>32</b>                       | 8 $\pm$ 3     | 28 $\pm$ 9              | 12 $\pm$ 2    | 28 $\pm$ 2                     | 1 $\pm$ 1     | 2 $\pm$ 2               | 2 $\pm$ 1     | 4 $\pm$ 1                 | 38 $\pm$ 2    | 45 $\pm$ 6              | 39 $\pm$ 2    | 35 $\pm$ 3                      | 56 $\pm$ 5    | 32 $\pm$ 12             | 48 $\pm$ 4    | 36 $\pm$ 16   |
|                       | <b>34</b>                       | 3 $\pm$ 1     | 13 $\pm$ 5              | 5 $\pm$ 2     | 15 $\pm$ 5                     |               |                         |               |                           | 15 $\pm$ 1    | 31 $\pm$ 3              | 17 $\pm$ 2    | 15 $\pm$ 3                      | 13 $\pm$ 6    | 21 $\pm$ 3              | 16 $\pm$ 4    | 23 $\pm$ 12   |
|                       | <b>36</b>                       | 1 $\pm$ 1     | 3 $\pm$ 1               | 1 $\pm$ 0.4   | 7 $\pm$ 2                      |               |                         |               |                           | 0.1 $\pm$ 0.2 |                         | 0.1 $\pm$ 0.1 |                                 |               |                         |               |               |
| <b>Alkanes</b>        | <b>27</b>                       | 2 $\pm$ 0.3   | 2 $\pm$ 1               | 2 $\pm$ 0.5   | 3 $\pm$ 1                      | 6 $\pm$ 1     | 6 $\pm$ 1               | 6 $\pm$ 1     | 6 $\pm$ 0.3               | 1 $\pm$ 0.3   | 3 $\pm$ 3               | 1 $\pm$ 0.4   | 1 $\pm$ 0.1                     | 0.2 $\pm$ 0.0 | 0.2 $\pm$ 0.0           | 0.2 $\pm$ 0.0 | 1 $\pm$ 1     |
|                       | <b>29</b>                       | 33 $\pm$ 2    | 25 $\pm$ 2              | 31 $\pm$ 3    | 17 $\pm$ 4                     | 78 $\pm$ 3    | 77 $\pm$ 10             | 78 $\pm$ 7    | 81 $\pm$ 1                | 22 $\pm$ 2    | 16 $\pm$ 3              | 22 $\pm$ 2    | 22 $\pm$ 2                      | 27 $\pm$ 1    | 27 $\pm$ 3              | 27 $\pm$ 1    | 35 $\pm$ 13   |
|                       | <b>31</b>                       | 53 $\pm$ 2    | 54 $\pm$ 7              | 53 $\pm$ 4    | 55 $\pm$ 4                     | 7 $\pm$ 2     | 5 $\pm$ 1               | 5 $\pm$ 2     | 5 $\pm$ 1                 | 63 $\pm$ 1    | 57 $\pm$ 10             | 63 $\pm$ 1    | 64 $\pm$ 0.5                    | 67 $\pm$ 1    | 67 $\pm$ 1              | 67 $\pm$ 1    | 59 $\pm$ 11   |
|                       | <b>33</b>                       | 7 $\pm$ 0.2   | 10 $\pm$ 0.3            | 8 $\pm$ 1     | 16 $\pm$ 4                     | 1 $\pm$ 0.4   | 2 $\pm$ 2               | 2 $\pm$ 1     | 1 $\pm$ 1                 | 9 $\pm$ 2     | 12 $\pm$ 7              | 9 $\pm$ 2     | 9 $\pm$ 1                       | 3 $\pm$ 1     | 3 $\pm$ 1               | 3 $\pm$ 1     | 2 $\pm$ 2     |
|                       | <b>35</b>                       | 0.5 $\pm$ 0.2 | 1 $\pm$ 1               | 1 $\pm$ 0.5   | 3 $\pm$ 1                      |               | 0.3 $\pm$ 0.3           | 0.2 $\pm$ 0.2 |                           | 0.1 $\pm$ 0.1 |                         | 0.1 $\pm$ 0.0 |                                 |               | 0.2 $\pm$ 0.2           | tr            | 0.1 $\pm$ 0.1 |
